# Supplementary material for: Biobased Waterborne Polyurethane-Ureas Modified with POSS-OH for Fluorine-Free Hydrophobic Textile Coatings
Source: MDPI journal article supplement (doi:10.3390/polym13203526), 2021-10-13
Supplement: s1 [file s1]

# Supplementary Material: Biobased Waterborne Polyurethane-ureas Modified with POSS-OH for Fluorine-free Hydrophobic Textile Coatings

Amado Lacruz, Mireia Salvador, Miren Blanco, Karmele Vidal, Amaia M. Goitandia, Lenka Martinková, Martin Kyselka, and Antxon Martínez de Ilarduya

## 1. Particle size distribution of WPUD

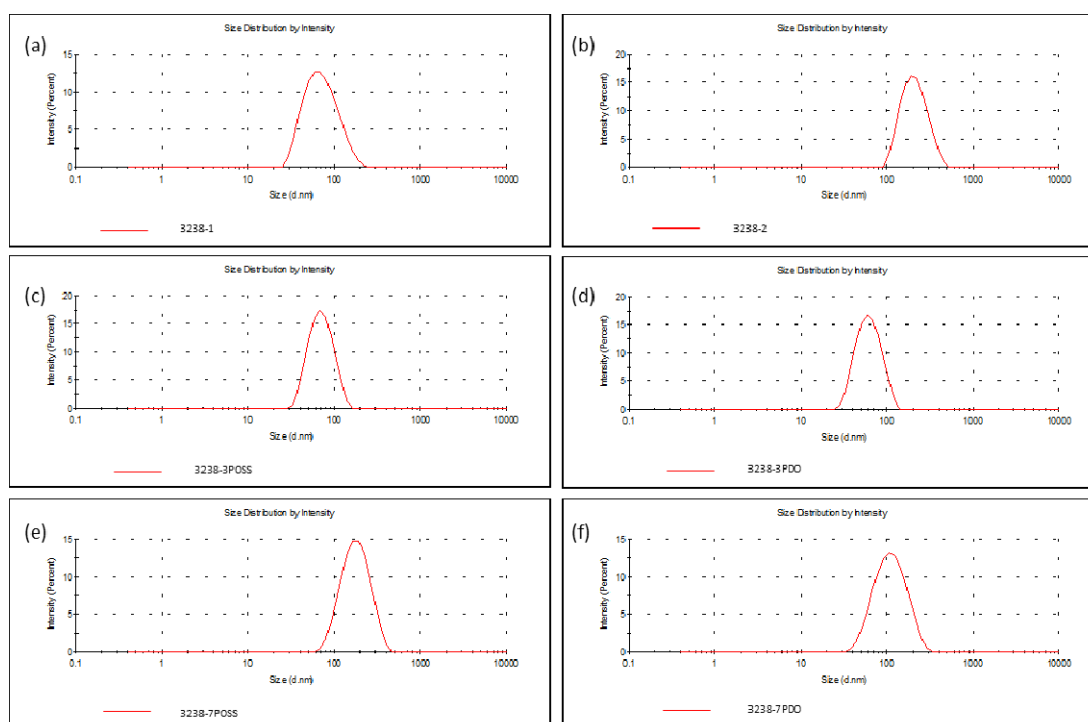

**Figure S1.** Particle size distribution of WPUD measured by DLS, (a) 3238-1, (b) 3238-2, (c) 3238-3POSS, (d) 3238-3PDO, (e) 3238-7POSS, (f) 3238-7PDO.

## 2. LUM measurements of WPUD

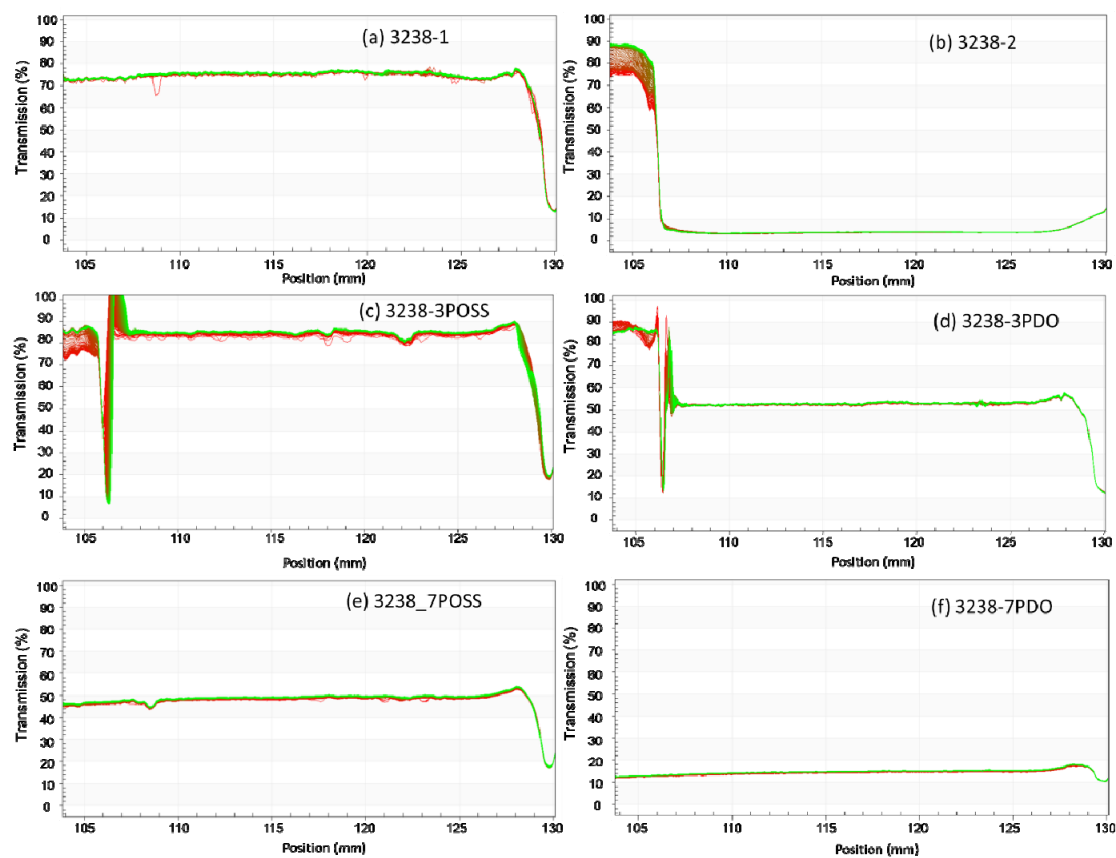

**Figure S2.** LUM transmission profiles of WPUD measured at 470 nm, 4 °C, Relative acceleration force (RCA) 2000 x g (3900 R.P.M.). (a) 3238-1, (b) 3238-2, (c) 3238-3POSS, (d) 3238-3PDO, (e) 3238-7POSS, (f) 3238-7PDO.

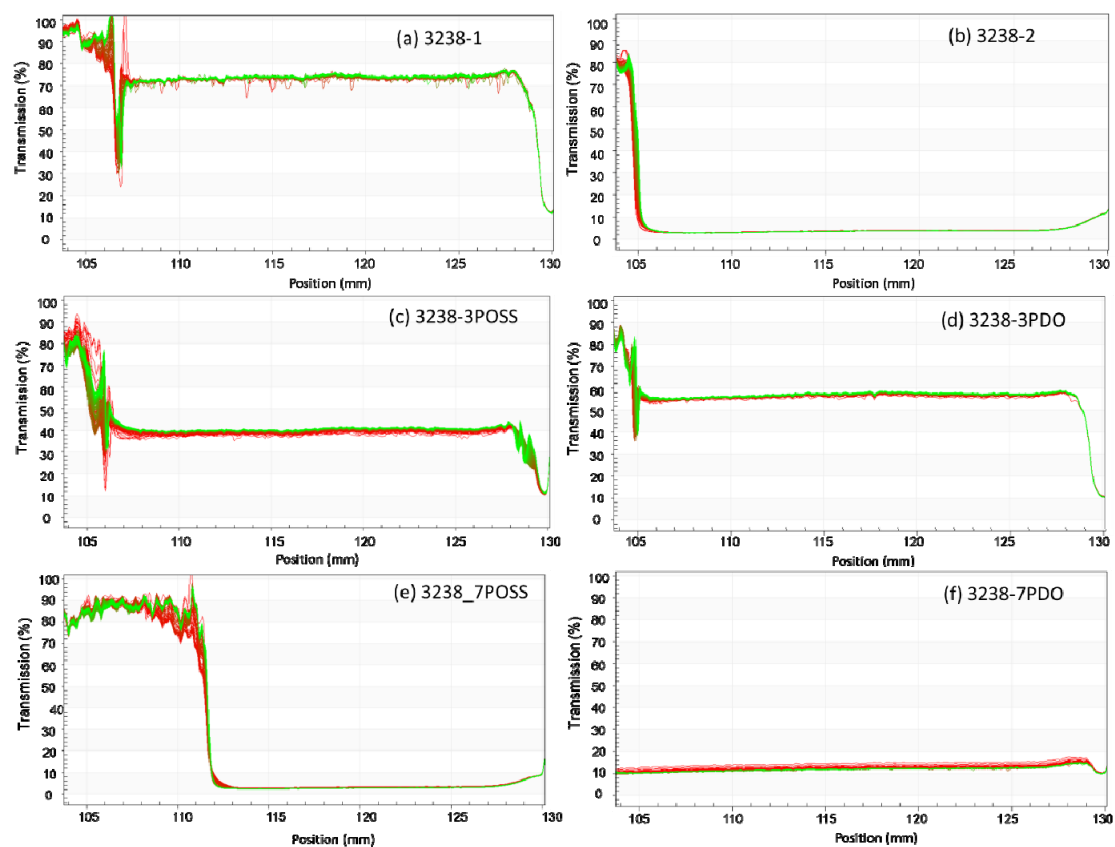

**Figure S3.** LUM transmission profiles of WPUD measured at 470 nm, 40 °C, Relative acceleration force (RCA) 2000 x g (3900 R.P.M.). (a) 3238-1, (b) 3238-2, (c) 3238-3POSS, (d) 3238-3PDO, (e) 3238-7POSS, (f) 3238-7PDO.
